# Supplementary material
Source: PubMed Central journal article supplement (PMC7720204)
Supplement: pnas.2006578117.sapp.pdf [file pnas.2006578117.sapp.pdf]

# PNAS

[www.pnas.org](http://www.pnas.org)

Supplementary Information for

Lack of Adipocyte Purinergic P2Y<sub>6</sub> Receptor Greatly Improves Whole Body Glucose Homeostasis

Shanu Jain, Sai P. Pydi, Kiran S. Toti, Bernard Robaye, Marco Idzko, Oksana Gavrilova, Jürgen Wess, Kenneth A. Jacobson

corresponding author: Kenneth A. Jacobson  
Email: [kennethj@niddk.nih.gov](mailto:kennethj@niddk.nih.gov)

**This PDF file includes:**

Figures S1 to S7  
Tables S1 to S3

## Supplementary Figures and Tables

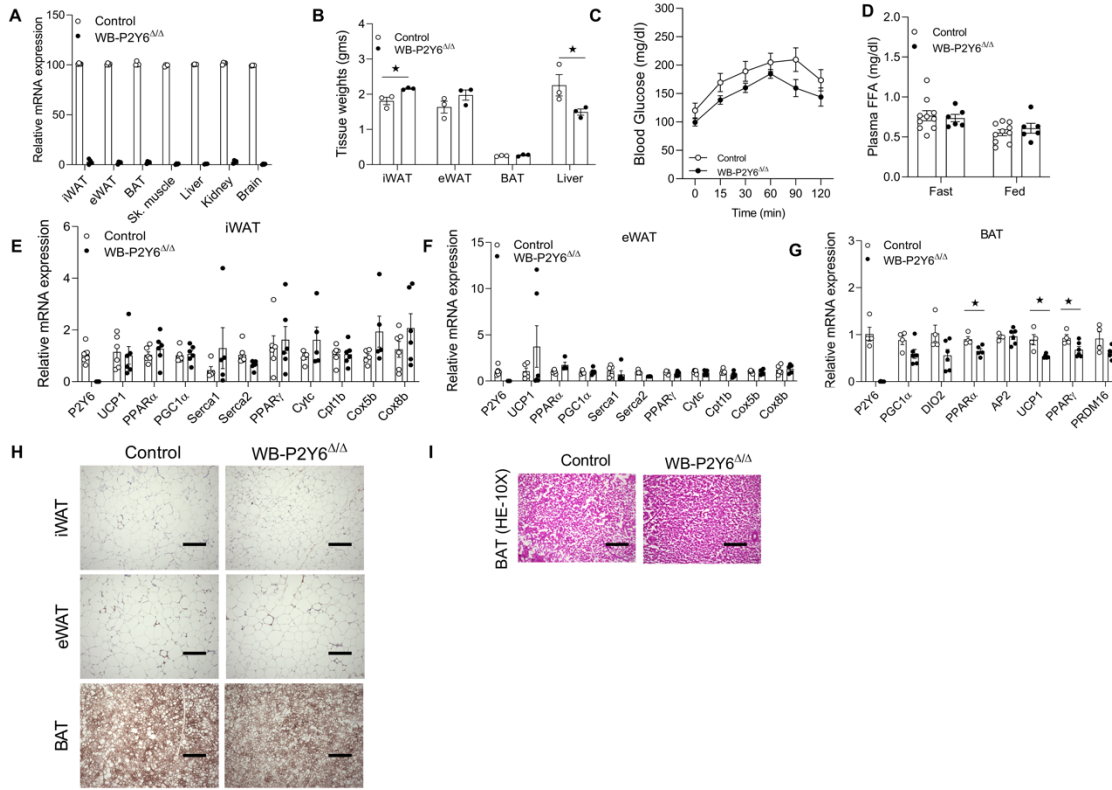

**Fig. S1.** Metabolic and expression profiling of WB-P2Y6 $\Delta/\Delta$  and control mice on HFD.

- (A) mRNA levels of P2Y6R in different tissues of WB-P2Y6 $\Delta/\Delta$  and control mice (n=3-4/group).
- (B) Tissue weights (iWAT, eWAT and BAT) of WB-P2Y6 $\Delta/\Delta$  and control mice (n=3/group).
- (C) Pyruvate tolerance test (PTT, 2 g/kg sodium pyruvate, i.p.) (n=5-9/group).
- (D) Fasting and fed plasma free fatty acid (FFA) levels (n=6-9/group).
- (E) – (G) Gene expression analysis in (E) iWAT, (F) eWAT and (G) BAT of WB-P2Y6 $\Delta/\Delta$  and control mice (n=5-6/group).
- (H) Representative UCP1 stained sections of iWAT, eWAT and BAT of WB-P2Y6 $\Delta/\Delta$  and control mice.
- (I) Representative H&E-stained sections of BAT from WB-P2Y6 $\Delta/\Delta$  and control mice on HFD. 18sRNA was taken as normalization control for RT-PCR analysis. (A-B, D-G: two-tailed Student's t-test; C: two-way ANOVA followed by Bonferroni's post hoc test).

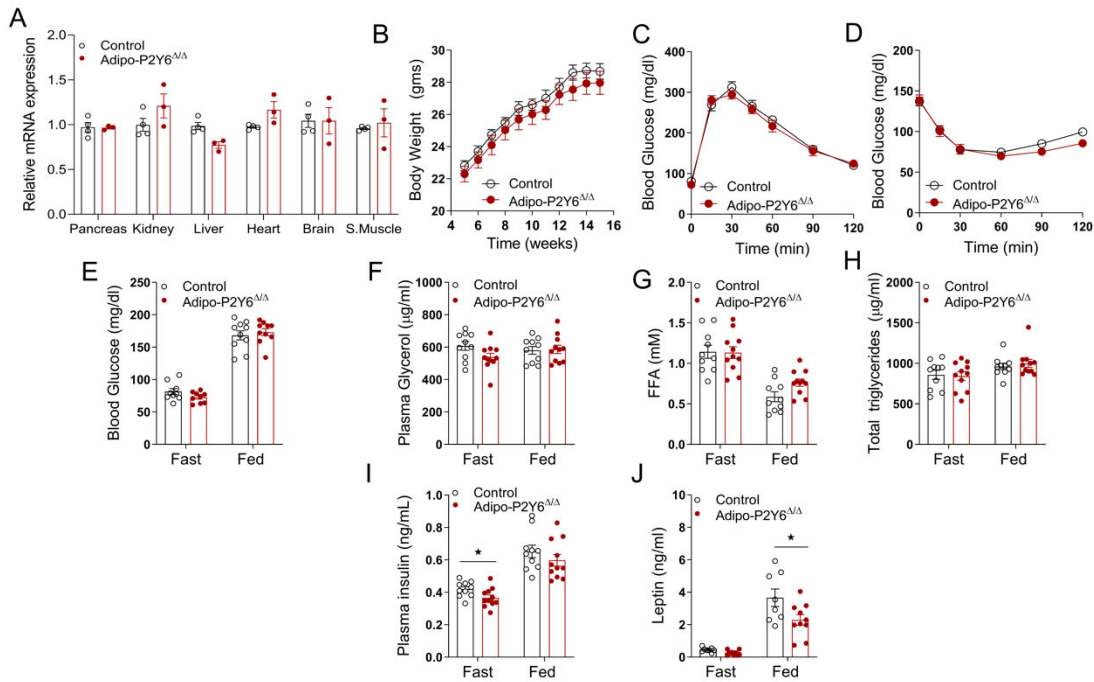

**Fig. S2.** Metabolic analysis of adipo-P2Y6<sup>ΔΔ</sup> and control mice maintained on chow diet (CD).

- (A) mRNA levels of P2Y<sub>6</sub>R in pancreas, kidney, liver, heart, brain and skeletal muscle of adipo-P2Y6<sup>ΔΔ</sup> and control mice (n=3/group).
- (B) Body weight measurements on CD (n=10-11/group).
- (C) Glucose tolerance test (IGTT, 2g /kg glucose i.p.) (n=9-10/group).
- (D) Insulin tolerance test (ITT, 0.75 U/kg insulin i.p.) (n=9-10/group).
- (E) Fasting and fed blood glucose levels (n=9-10/group).
- (F) Fasting and fed plasma glycerol levels (n=9-10/group).
- (G) Fasting plasma free fatty acid (FFA) levels (n=10-11/group).
- (H) Fasting and fed total triglyceride levels (n= 10-11/group).
- (I) Fasting and fed plasma insulin levels (n=10-11/group).
- (J) Fasting and fed plasma leptin levels (n=8-10/group).

All data are expressed as means ± SEM. \*p < 0.05 (A-B, E-J: two-tailed Student's t-test; C-D: two-way ANOVA followed by Bonferroni's post hoc test).

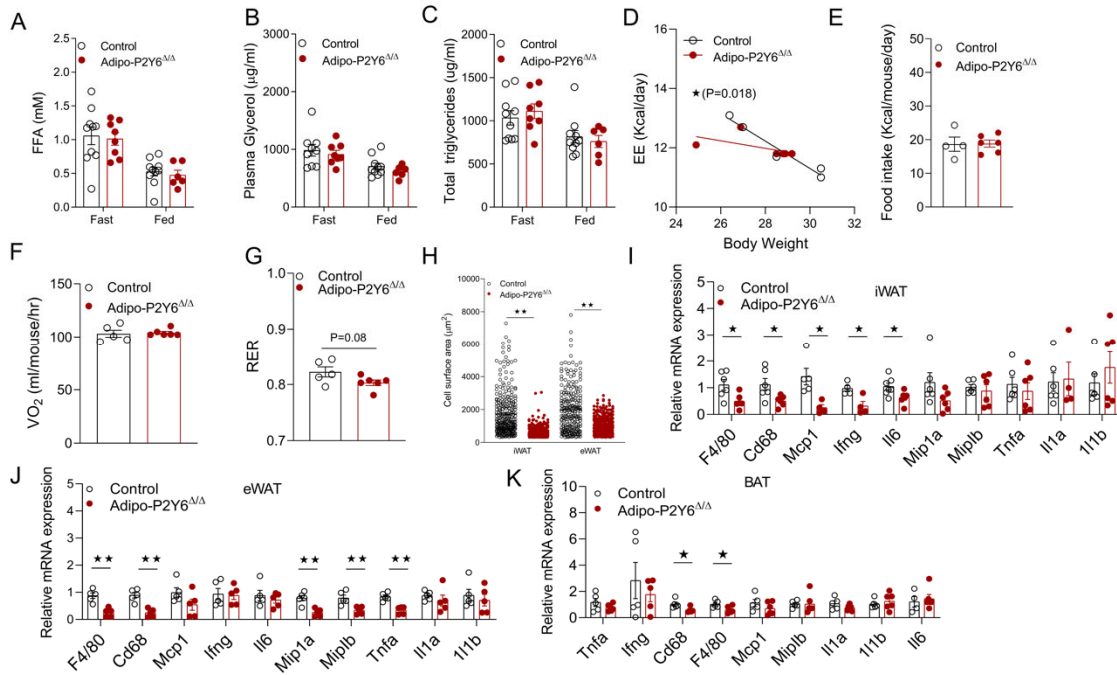

**Fig. S3.** Metabolic analysis of adipo-P2Y6 $\Delta/\Delta$  and control mice on high fat diet (HFD).

- (A) Fasting plasma free fatty acid (FFA) levels (n=6-10/group).  
 (B) Fasting and fed plasma glycerol levels (n=6-10/group).  
 (C) Fasting and fed total triglyceride levels (n=6-10/group).  
 (D) Total energy expenditure vs total body mass (n=5-6/group).  
 (E) Food intake (n=4-6/group).  
 (F) Oxygen consumption rate ( $V_{O_2}$ ) (n=5-6/group).  
 (G) Respiratory exchange ratio (RER) (n=5-6/group).  
 (H) Cell surface area quantified using Adiposoft software in iWAT and eWAT sections. (n=5 sections/group).  
 (I-K) mRNA expression levels of inflammatory markers in (I) iWAT, (J) eWAT, and (K) BAT of HFD fed adipo-P2Y6 $\Delta/\Delta$  and control mice (n=4-6/group).

18sRNA was taken as normalization control for RT-PCR analysis. Data (A-C, E-K) are expressed as means  $\pm$  SEM. Analysis of covariance (ANCOVA) was performed for data (D). \* $p < 0.05$  (two-tailed Student's t-test). Indirect calorimetry studies (D-G) were done with mice during first week of HFD feeding.

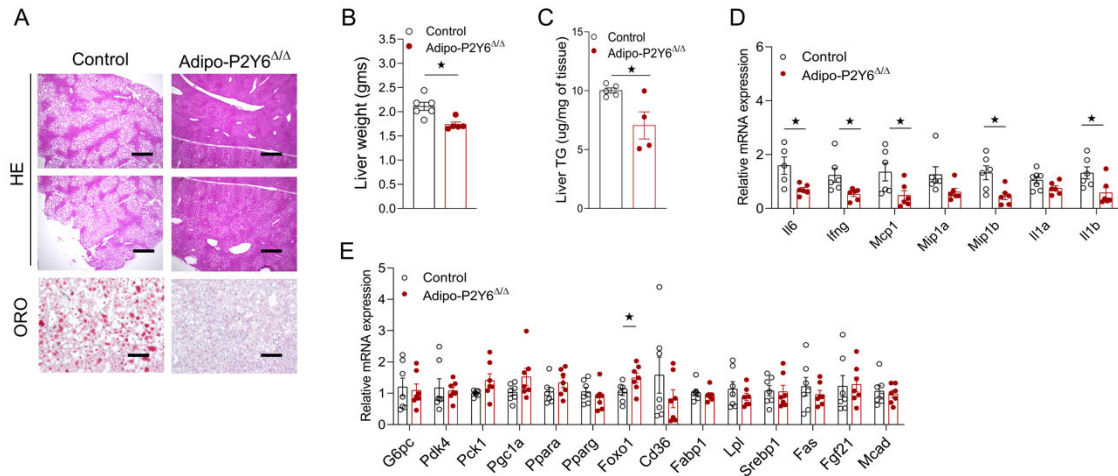

**Fig. S4.** Reduced hepatic steatosis and hepatic inflammation in adipo-P2Y6<sup>Δ/Δ</sup> mice maintained on high fat diet (HFD).

- (A) Representative H&E and Oil Red O (ORO) stained sections of liver from adipo-P2Y6<sup>Δ/Δ</sup> and control mice on HFD.
- (B) Liver weight (grams) from adipo-P2Y6<sup>Δ/Δ</sup> and control mice (n=5-6/group).
- (C) Liver triglyceride (TG) levels from adipo-P2Y6<sup>Δ/Δ</sup> and control mice (n=4/group).
- (D) mRNA expression levels of inflammatory markers in the liver of adipo-P2Y6<sup>Δ/Δ</sup> and control mice (n=5-6/group).
- (E) Expression analysis of genes involved in hepatic glucose and lipid metabolism (n=7/group).

18sRNA was taken as normalization control for RT-PCR analysis. All data are expressed as means  $\pm$  SEM. \*p < 0.05 (two-tailed Student's t-test).

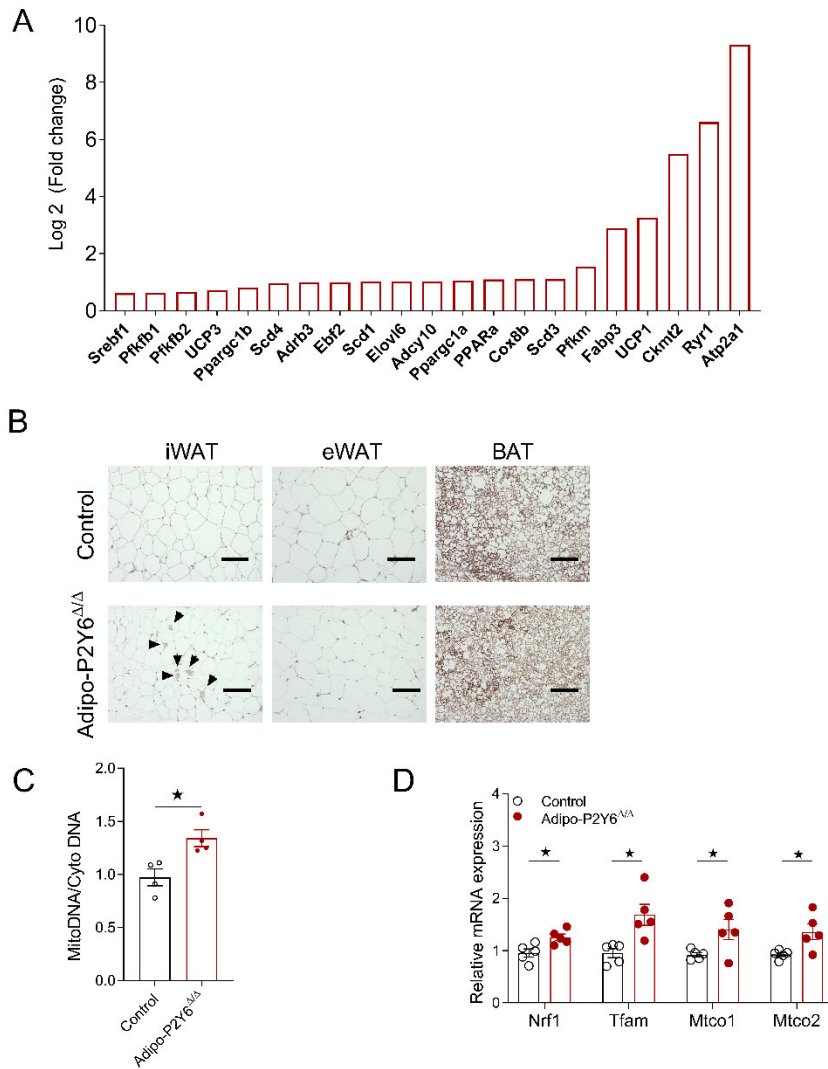

**Fig. S5.** Expression profiling and UCP1 staining in adipose tissues of adipo-P2Y6 $\Delta\Delta$  mice maintained on HFD.

- (A) Log2 (Fold change) of genes involved in imparting beige-like phenotype to iWAT of adipo-P2Y6 $\Delta\Delta$  mice ( $p < 0.05$ ) ( $n = 6$  libraries/group).
- (B) Representative UCP1 stained sections of iWAT, eWAT and BAT of adipo-P2Y6 $\Delta\Delta$  and control mice.
- (C) MitoDNA (mitochondrial DNA)/CytoDNA (cytoplasmic DNA) in iWAT of adipo-P2Y6 $\Delta\Delta$  and control mice ( $n = 4$ /group).
- (D) mRNA expression levels of mitochondrial biogenesis markers in the iWAT of adipo-P2Y6 $\Delta\Delta$  and control mice ( $n = 4-6$ /group).

The expression of 18sRNA was used to normalize qRT-PCR data. All data are expressed as means  $\pm$  SEM. \* $p < 0.05$ , \*\* $p < 0.01$ , \*\*\* $p < 0.001$  (two-tailed Student's t-test).

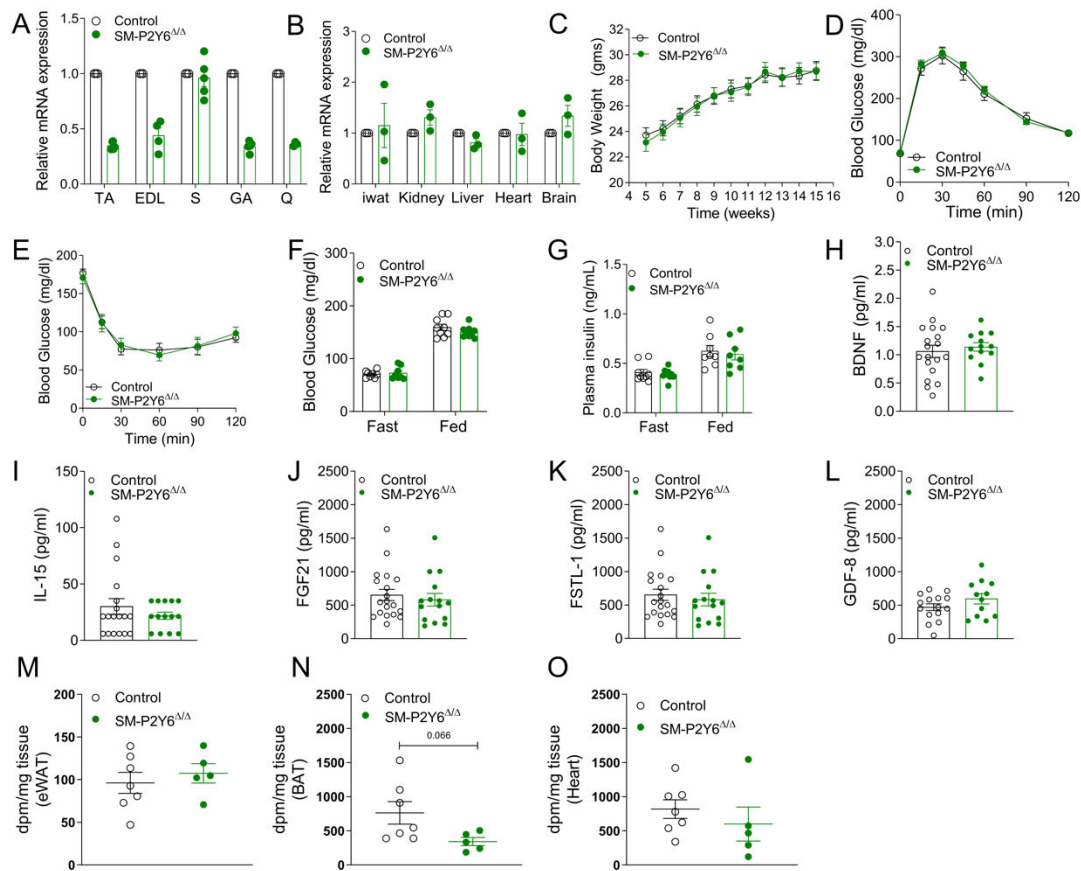

**Fig. S6.** Metabolic analysis of SM-P2Y6 $\Delta/\Delta$  and control mice maintained on CD or HFD.

- (A) mRNA levels of P2Y<sub>6</sub>R in tibialis anterior (TA), gastrocnemius (G), quadriceps (Q), soleus (S) muscle of SM-P2Y6 $\Delta/\Delta$  and control mice (n=3-4/group).
- (B) mRNA levels of P2Y<sub>6</sub>R in IWAT, kidney, liver, heart and brain of SM-P2Y6 $\Delta/\Delta$  and control mice (n=3/group).
- (C) Body weight measurements on CD (n=9/group).
- (D) Glucose tolerance test (IGTT, 2g /kg glucose i.p.) (n=9/group).
- (E) Insulin tolerance test (ITT, 0.75 U/kg insulin i.p.) (n=9/group).
- (F) Fasting and fed blood glucose levels (n=8-9/group).
- (G) Fasting and fed plasma insulin levels (n=8-9/group).
- (H-L) Multiplex quantification of myokines in the plasma of SM-P2Y6 $\Delta/\Delta$  and control mice (n=13-16/group).
- (M-O) In vivo glucose uptake in eWAT, BAT and heart tissues of SM-P2Y6 $\Delta/\Delta$  and control mice (n=5-7/group).

18sRNA was taken as normalization control for RT-PCR analysis. All data are expressed as means  $\pm$  SEM. (A-C, F-O: two-tailed Student's t-test; D-E: two-way ANOVA followed by Bonferroni's post hoc test).



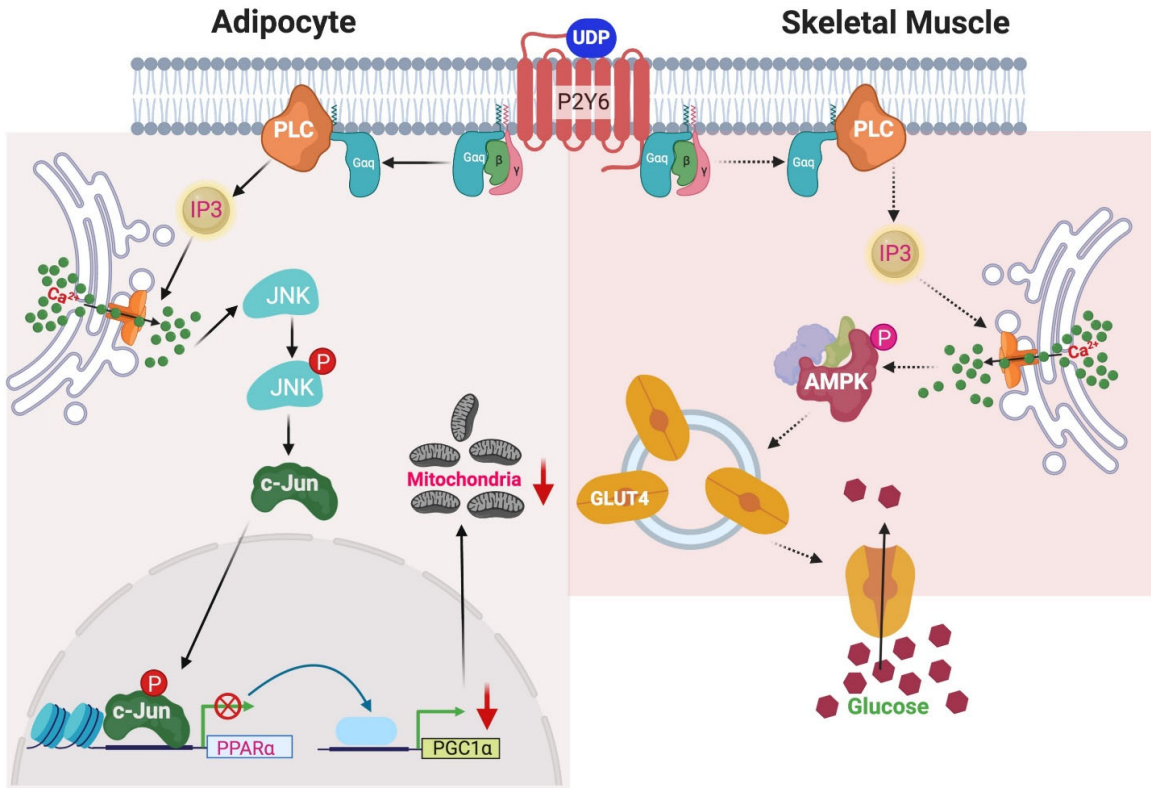

**Fig. S7.** Molecular mechanism for the action of P2Y<sub>6</sub>R in white adipocytes and skeletal muscle.



**Table S1.** Differentially regulated (up- and down-regulated) genes in iWAT of adipo-P2Y6<sup>Δ/Δ</sup> mice.

| Log 2 (Fold change) | Gene symbol   | Log 2 (Fold change) | Gene symbol   | Log 2 (Fold change) | Gene symbol   |
|---------------------|---------------|---------------------|---------------|---------------------|---------------|
| 12.878              | Myh4          | -3.645              | Siglece       | -0.646              | App           |
| 9.759               | Ckm           | -3.252              | Arg1          | -0.646              | Itga5         |
| 9.429               | Mylk4         | -3.244              | Spp1          | -0.644              | Slco3a1       |
| 9.327               | Atp2a1        | -2.956              | Cck           | -0.642              | Plekho1       |
| 9.264               | Tnnt3         | -2.907              | Slit2         | -0.641              | Ephb3         |
| 8.79                | LOC100503495  | -2.753              | Nptx1         | -0.639              | Nes           |
| 8.683               | Tcap          | -2.715              | Gpr50         | -0.639              | Il17d         |
| 8.666               | Myoz1         | -2.65               | Gdf3          | -0.639              | Cdh5          |
| 8.519               | A930016O22Rik | -2.285              | Rpph1         | -0.638              | Tead2         |
| 8.466               | Actn3         | -2.228              | Aadac         | -0.638              | Cmtm3         |
| 8.435               | Myom2         | -2.165              | Hpgds         | -0.637              | Notch4        |
| 7.96                | Ano5          | -2.153              | Acox1         | -0.636              | Mxra8         |
| 7.632               | Trim54        | -2.133              | Tmem132b      | -0.635              | Aspn          |
| 7.46                | Mybpc2        | -2.106              | Rmrp          | -0.631              | Arhgap18      |
| 7.401               | Trim63        | -2.092              | Itgad         | -0.63               | Sox17         |
| 7.261               | Tnni2         | -2.088              | Hpx           | -0.628              | Vat1          |
| 7.186               | Myf6          | -2.062              | Xkr5          | -0.628              | Sparcl1       |
| 7.16                | Art1          | -2.044              | Hist1h2ap     | -0.622              | Lipa          |
| 7.096               | Gm8210        | -2.044              | Hist1h2ao     | -0.619              | Col6a3        |
| 7.087               | 2310002L09Rik | -2.025              | Egfem1        | -0.618              | Lmo1          |
| 6.987               | LOC637171     | -1.992              | D2Ert640e     | -0.618              | Hist2h3c2-ps  |
| 6.898               | Myh2          | -1.991              | D330022K07Rik | -0.616              | 2010001K21Rik |
| 6.822               | Tnnc2         | -1.982              | Dpep3         | -0.615              | Cyp4b1        |
| 6.778               | Ppp1r3a       | -1.938              | 1600015I10Rik | -0.611              | Adamts2       |
| 6.754               | 2310045N14Rik | -1.912              | Gm949         | -0.61               | Plxnb2        |
| 6.679               | Ky            | -1.9                | Il1rn         | -0.609              | Gpc1          |
| 6.606               | Ryr1          | -1.898              | Atp6v0d2      | -0.608              | Notch3        |
| 6.59                | Myot          | -1.895              | Tm4sf19       | -0.608              | Fam189a2      |
| 6.309               | Igfn1         | -1.892              | Aspm          | -0.608              | Tmem165       |
| 6.306               | Mypn          | -1.878              | Vipr2         | -0.608              | Gnao1         |
| 6.291               | Klhl31        | -1.869              | Clec4d        | -0.607              | Hist1h2bh     |
| 6.288               | Odf3l2        | -1.861              | BC030867      | -0.607              | Ctla2b        |
| 6.278               | Xirp2         | -1.852              | Rnu3b2        | -0.605              | Ctla2a        |
| 6.275               | Cacna1s       | -1.852              | Rnu3b1        | -0.605              | Mtap7         |
| 6.262               | Nrap          | -1.852              | Rnu3b3        | -0.604              | Ppap2a        |
| 6.205               | Myh3          | -1.836              | Them5         | -0.604              | Spats2        |
| 6.026               | Ttn           | -1.836              | Myh7b         | -0.603              | Col15a1       |
| 6.001               | Mylpf         | -1.83               | Rnu3b4        | -0.603              | Pea15a        |
| 5.996               | Smpx          | -1.793              | Ptprz1        | -0.603              | Smc2          |

|       |               |  |        |               |        |               |
|-------|---------------|--|--------|---------------|--------|---------------|
| 5.984 | Mylk2         |  | -1.791 | Gm5150        | -0.602 | Nrp2          |
| 5.969 | 2310065F04Rik |  | -1.79  | Wisp1         | -0.601 | Myl9          |
| 5.89  | LOC100503752  |  | -1.778 | LOC790964     | -0.6   | 2810405K02Rik |
| 5.878 | Lmod2         |  | -1.778 | Oit3          | -0.6   | Gpr56         |
| 5.82  | Nctc1         |  | -1.773 | 4931431B13Rik | -0.6   | Lhfp          |
| 5.81  | Eef1a2        |  | -1.771 | Rnf128        | -0.599 | Sdsl          |
| 5.799 | Tmem233       |  | -1.764 | Chrm4         | -0.598 | Col6a1        |
| 5.754 | 2310015B20Rik |  | -1.762 | Trem2         | -0.598 | Tinag1        |
| 5.621 | Kbtbd10       |  | -1.76  | Gtse1         | -0.597 | Sparc         |
| 5.601 | Pvalb         |  | -1.754 | LOC434410     | -0.597 | Slc25a24      |
| 5.563 | Asb11         |  | -1.753 | Rn18s         | -0.597 | Fstl1         |
| 5.525 | Lrrc38        |  | -1.74  | Mrgprg        | -0.595 | Col5a1        |
| 5.514 | Myoz3         |  | -1.738 | Masp1         | -0.595 | 4-Sep         |
| 5.498 | Hhatl         |  | -1.728 | Lars2         | -0.595 | Pxn           |
| 5.497 | Ckmt2         |  | -1.699 | Vsig8         | -0.594 | Cela1         |
| 5.492 | Myo18b        |  | -1.694 | Dnahc12       | -0.593 | 1300015D01Rik |
| 5.461 | Myh1          |  | -1.667 | Lipf          | -0.593 | Ptgfrn        |
| 5.388 | Rpl3l         |  | -1.654 | Gpnmb         | -0.592 | Lrrc1         |
| 5.337 | Ampd1         |  | -1.646 | Scn8a         | -0.59  | LOC100503009  |
| 5.276 | 1110002E22Rik |  | -1.643 | Adam8         | -0.59  | Neur1b        |
| 5.268 | Smtnl1        |  | -1.64  | Tm7sf4        | -0.588 | Morf4l1       |
| 5.246 | Hfe2          |  | -1.635 | 8030451A03Rik | -0.585 | Prkcdbp       |
| 5.229 | Dhrs7c        |  | -1.623 | Tlr13         | -0.585 | Adamts12      |
| 5.139 | Abra          |  | -1.614 | Bub1b         | -0.585 | Me1           |
| 5.137 | Rbfox1        |  | -1.611 | Mmp12         | -0.583 | Col4a1        |
| 5.099 | LOC100503103  |  | -1.599 | Dhrs9         |        |               |
| 5.094 | Hrc           |  | -1.585 | Kif2c         |        |               |
| 5.063 | Jsrp1         |  | -1.567 | Gm9696        |        |               |
| 5.026 | Clcn1         |  | -1.558 | Dusp5         |        |               |
| 4.995 | Kbtbd5        |  | -1.543 | Olr1          |        |               |
| 4.959 | Sh3bgr        |  | -1.54  | Slc9a4        |        |               |
| 4.868 | 2310010M20Rik |  | -1.531 | Emid2         |        |               |
| 4.834 | Kcnj12        |  | -1.529 | Hk3           |        |               |
| 4.785 | Mybpc1        |  | -1.519 | AA914427      |        |               |
| 4.68  | Mb            |  | -1.516 | Mis18bp1      |        |               |
| 4.612 | Cacng1        |  | -1.515 | LOC640053     |        |               |
| 4.612 | Kcnj11        |  | -1.506 | Oxtr          |        |               |
| 4.575 | Asb5          |  | -1.504 | Tnip3         |        |               |
| 4.517 | Pygm          |  | -1.499 | Cacng5        |        |               |
| 4.453 | Kcna7         |  | -1.493 | Cenpi         |        |               |
| 4.385 | Lmod3         |  | -1.484 | Kif23         |        |               |
| 4.365 | Neb           |  | -1.484 | Shcbp1        |        |               |
| 4.32  | Ube2c         |  | -1.484 | Syt4          |        |               |

|       |               |  |        |               |
|-------|---------------|--|--------|---------------|
| 4.277 | Sgcg          |  | -1.475 | Tmem144       |
| 4.153 | Plcd4         |  | -1.466 | C130079G13Rik |
| 4.107 | Lrrc2         |  | -1.464 | Hmmr          |
| 3.965 | Apobec2       |  | -1.463 | Ctgf          |
| 3.899 | Trdn          |  | -1.463 | Tph2          |
| 3.836 | 1810041L15Rik |  | -1.453 | F10           |
| 3.704 | Txlnb         |  | -1.446 | Ccnb1         |
| 3.652 | Pgam2         |  | -1.446 | Btbd17        |
| 3.646 | Ddit4l        |  | -1.443 | Slc25a13      |
| 3.611 | Sypl2         |  | -1.438 | Ubd           |
| 3.547 | Acta1         |  | -1.434 | 2010317E24Rik |
| 3.543 | Tmod4         |  | -1.424 | Spag5         |
| 3.506 | Dusp13        |  | -1.402 | Fam64a        |
| 3.422 | A530098C11Rik |  | -1.4   | Cthrc1        |
| 3.32  | Trim72        |  | -1.395 | 4833422F24Rik |
| 3.288 | Dusp27        |  | -1.395 | Gpr176        |
| 3.26  | Ucp1          |  | -1.392 | Clsn          |
| 3.235 | Slc9a2        |  | -1.391 | Ccdc107       |
| 3.227 | Sec14l5       |  | -1.391 | 2210406H18Rik |
| 3.195 | Rabep2        |  | -1.382 | C3ar1         |
| 3.152 | Ncam2         |  | -1.373 | Melk          |
| 3.124 | Unc13c        |  | -1.371 | Slc37a2       |
| 3.054 | Scn4a         |  | -1.352 | Kif22         |
| 2.993 | Wnk2          |  | -1.349 | Shroom2       |
| 2.969 | Ank1          |  | -1.347 | Gm16499       |
| 2.967 | Ppp1r14c      |  | -1.331 | Zfp367        |
| 2.882 | Fabp3         |  | -1.329 | Diap3         |
| 2.844 | Fbxo40        |  | -1.323 | Thbs1         |
| 2.826 | Accsl         |  | -1.323 | Nuf2          |
| 2.801 | A630019I02Rik |  | -1.323 | Ina           |
| 2.731 | Pld5          |  | -1.321 | 2010300C02Rik |
| 2.604 | Dok7          |  | -1.319 | Cdc20         |
| 2.581 | Hepacam       |  | -1.305 | Arl11         |
| 2.572 | Mup11         |  | -1.298 | Dlgap5        |
| 2.524 | Mup10         |  | -1.296 | Adamts4       |
| 2.51  | Eno3          |  | -1.292 | Fgf9          |
| 2.481 | Ldb3          |  | -1.291 | Ccnb2         |
| 2.478 | Sema3d        |  | -1.282 | Top2a         |
| 2.454 | Gm10032       |  | -1.28  | Neil3         |
| 2.453 | LOC100503313  |  | -1.275 | Nceh1         |
| 2.393 | Cmya5         |  | -1.272 | Mxd3          |
| 2.379 | Agt           |  | -1.259 | Gm15270       |
| 2.369 | LOC100048884  |  | -1.257 | Atf3          |

|       |               |  |        |               |
|-------|---------------|--|--------|---------------|
| 2.36  | Asb14         |  | -1.255 | Ccna2         |
| 2.354 | Tpm2          |  | -1.255 | Cenpe         |
| 2.339 | Asb16         |  | -1.254 | Chsy3         |
| 2.334 | Tpm1          |  | -1.249 | Foxm1         |
| 2.333 | Casq1         |  | -1.248 | Iqgap3        |
| 2.316 | Mup7          |  | -1.231 | Prr11         |
| 2.296 | Asb2          |  | -1.229 | Mki67         |
| 2.294 | Mup17         |  | -1.226 | Cd68          |
| 2.294 | Mup19         |  | -1.226 | Spna1         |
| 2.292 | Mup15         |  | -1.225 | Emr1          |
| 2.272 | Mup2          |  | -1.224 | 1700023B13Rik |
| 2.262 | Stac3         |  | -1.224 | Dpep2         |
| 2.242 | Mtap4         |  | -1.22  | Tpx2          |
| 2.225 | Synpo2l       |  | -1.219 | Cd300a        |
| 2.195 | Ppl           |  | -1.219 | Cd300lb       |
| 2.194 | Pde4dip       |  | -1.217 | Nck1          |
| 2.181 | LOC100039029  |  | -1.216 | Gsg1l         |
| 2.165 | Smyd1         |  | -1.214 | Fam65c        |
| 2.159 | Gpr165        |  | -1.213 | Itgax         |
| 2.138 | LOC671917     |  | -1.209 | Prc1          |
| 2.123 | Prtn3         |  | -1.205 | Depdc1a       |
| 2.105 | Tmem38a       |  | -1.205 | Dbf4          |
| 2.103 | Cldn19        |  | -1.201 | Cenpm         |
| 2.094 | C030030A07Rik |  | -1.2   | Sgol2         |
| 2.083 | Fa2h          |  | -1.198 | Pbk           |
| 2.012 | Myoc          |  | -1.197 | Mtl5          |
| 2.01  | Tmem56        |  | -1.193 | Birc5         |
| 1.987 | Tuba8         |  | -1.189 | Lgals3        |
| 1.973 | A330074K22Rik |  | -1.18  | S100a8        |
| 1.955 | Rbm20         |  | -1.177 | Cenpf         |
| 1.944 | Scn4b         |  | -1.168 | Casc5         |
| 1.904 | C7            |  | -1.166 | Stil          |
| 1.904 | Gldn          |  | -1.162 | Mpeg1         |
| 1.895 | Myl1          |  | -1.159 | Fam83d        |
| 1.883 | Pcdh20        |  | -1.159 | Cd200r1       |
| 1.843 | Gsta4         |  | -1.159 | Ccnf          |
| 1.836 | Baiap2l2      |  | -1.159 | Bub1          |
| 1.814 | Vstm2b        |  | -1.159 | Zwilch        |
| 1.799 | D430041D05Rik |  | -1.157 | Rab15         |
| 1.779 | Il1r2         |  | -1.151 | E030010A14Rik |
| 1.757 | Dhcr7         |  | -1.151 | Kirrel3       |
| 1.745 | Gjc3          |  | -1.151 | Kif4          |
| 1.744 | Ehbp1         |  | -1.151 | A1605517      |

|       |               |  |        |               |
|-------|---------------|--|--------|---------------|
| 1.741 | Lrrtm1        |  | -1.145 | Trfr2         |
| 1.702 | Phkg1         |  | -1.145 | Clec4a2       |
| 1.696 | Murc          |  | -1.142 | Ncaph         |
| 1.682 | Zfp949        |  | -1.142 | Ckap2l        |
| 1.671 | Aspg          |  | -1.138 | D2Erttd750e   |
| 1.668 | Cyp2f2        |  | -1.137 | Igsf6         |
| 1.655 | Drp2          |  | -1.137 | Mastl         |
| 1.624 | Rassf6        |  | -1.135 | Cd84          |
| 1.609 | Ugt8a         |  | -1.131 | Esco2         |
| 1.576 | Acacb         |  | -1.128 | Mrc2          |
| 1.544 | Vnn1          |  | -1.124 | Postn         |
| 1.54  | Pfkm          |  | -1.117 | Scg3          |
| 1.522 | Sbk2          |  | -1.113 | Dfna5         |
| 1.508 | Mal           |  | -1.112 | F630043A04Rik |
| 1.5   | Lrrn4         |  | -1.109 | Tbxas1        |
| 1.499 | Gm7582        |  | -1.103 | Slc13a3       |
| 1.491 | Des           |  | -1.101 | E130306D19Rik |
| 1.49  | Pon1          |  | -1.1   | C77080        |
| 1.487 | Nfe2l3        |  | -1.096 | Hmox1         |
| 1.468 | Dkk2          |  | -1.091 | Kif11         |
| 1.462 | Chl1          |  | -1.081 | Spc25         |
| 1.46  | Gm5567        |  | -1.062 | Gpsm2         |
| 1.453 | LOC100503433  |  | -1.059 | Gas2l3        |
| 1.453 | Mpz           |  | -1.053 | Ccdc99        |
| 1.452 | Aatk          |  | -1.052 | Casq2         |
| 1.448 | LOC100503923  |  | -1.049 | Clec12a       |
| 1.419 | D930003E18Rik |  | -1.043 | Rin3          |
| 1.414 | Slc1a3        |  | -1.042 | Fcer1g        |
| 1.376 | Gpx3          |  | -1.042 | Brca1         |
| 1.375 | Gm129         |  | -1.034 | Cdca2         |
| 1.36  | Sult1e1       |  | -1.032 | Unc79         |
| 1.357 | B230303O12Rik |  | -1.032 | Plk1          |
| 1.352 | LOC100041903  |  | -1.028 | Rnd2          |
| 1.348 | St6galnac5    |  | -1.028 | Lilrb4        |
| 1.337 | Cfd           |  | -1.027 | Kcnj14        |
| 1.333 | Acsm3         |  | -1.024 | 5430435G22Rik |
| 1.319 | Slc43a1       |  | -1.02  | Kcnq1         |
| 1.293 | Zfp563        |  | -1.02  | Ckap2         |
| 1.291 | LOC100503767  |  | -1.019 | Cdca8         |
| 1.272 | LOC552874     |  | -1.018 | Ccl9          |
| 1.25  | Fn3k          |  | -1.017 | Gp49a         |
| 1.248 | A330049M08Rik |  | -1.017 | Atp1a3        |
| 1.248 | 2310046A06Rik |  | -1.016 | Ryr2          |

|       |               |  |        |               |
|-------|---------------|--|--------|---------------|
| 1.243 | LOC100503206  |  | -1.012 | Ect2          |
| 1.239 | Mpzl2         |  | -1.008 | Plxna4        |
| 1.233 | Acaca         |  | -0.998 | Fhl2          |
| 1.228 | Ccdc37        |  | -0.997 | Sh3bgrl2      |
| 1.222 | Fam83g        |  | -0.997 | Disc1         |
| 1.207 | Orm3          |  | -0.995 | Rgs2          |
| 1.198 | 4930573O21Rik |  | -0.994 | Rccd1         |
| 1.193 | Sctr          |  | -0.99  | Ephb1         |
| 1.189 | Slc2a3        |  | -0.988 | Dhcr24        |
| 1.187 | Celsr2        |  | -0.986 | Ret           |
| 1.185 | Ank3          |  | -0.983 | Cdk1          |
| 1.172 | 4931408A02Rik |  | -0.981 | Cd276         |
| 1.163 | Plp1          |  | -0.981 | Gm4952        |
| 1.153 | BC005764      |  | -0.966 | Rad51ap1      |
| 1.152 | Cdh9          |  | -0.965 | Tnfrsf11a     |
| 1.15  | Kcna1         |  | -0.962 | Aplnr         |
| 1.142 | Ism1          |  | -0.96  | LOC100503416  |
| 1.134 | Angpt1        |  | -0.957 | Tbx18         |
| 1.134 | Lgi2          |  | -0.954 | Myo1f         |
| 1.116 | Clip4         |  | -0.95  | Lgmn          |
| 1.101 | Scd3          |  | -0.95  | Mfap4         |
| 1.1   | Cox8b         |  | -0.948 | Nek2          |
| 1.096 | Ppara         |  | -0.948 | Diras2        |
| 1.095 | Rorc          |  | -0.947 | Olfm2         |
| 1.093 | Morn1         |  | -0.944 | Fstl3         |
| 1.084 | Inmt          |  | -0.943 | Slc11a1       |
| 1.067 | Thrsp         |  | -0.942 | F2r           |
| 1.06  | Ppargc1a      |  | -0.941 | Sncaip        |
| 1.056 | Eif4a2        |  | -0.936 | Trp53i11      |
| 1.05  | C2            |  | -0.929 | Adamts7       |
| 1.046 | Reln          |  | -0.927 | Stmn1         |
| 1.032 | Myo5c         |  | -0.925 | Dpysl3        |
| 1.032 | Adcy10        |  | -0.923 | Slc15a3       |
| 1.026 | Elovl6        |  | -0.922 | Gucy1a2       |
| 1.023 | LOC100503180  |  | -0.916 | Tnc           |
| 1.021 | Plekha1       |  | -0.915 | Clec7a        |
| 1.019 | Mbp           |  | -0.913 | Cdkn1a        |
| 1.018 | Pcsk4         |  | -0.913 | Lair1         |
| 1.017 | Pck1          |  | -0.91  | Sdc1          |
| 1.016 | Scd1          |  | -0.909 | P2ry6         |
| 1.008 | Gulp1         |  | -0.907 | Cep70         |
| 1.005 | Cd209b        |  | -0.907 | Upp1          |
| 1     | 4921509J17Rik |  | -0.904 | 2610524H06Rik |

|       |               |  |        |               |
|-------|---------------|--|--------|---------------|
| 0.987 | Adrb3         |  | -0.904 | Sh2d3c        |
| 0.987 | Ebf2          |  | -0.903 | Cd93          |
| 0.987 | B230218P12Rik |  | -0.903 | Fam70a        |
| 0.987 | Lima1         |  | -0.9   | Pik3ap1       |
| 0.979 | 2010016118Rik |  | -0.9   | Ccdc64        |
| 0.979 | Hmgcs2        |  | -0.898 | Pawr          |
| 0.978 | Gli2          |  | -0.898 | Rell1         |
| 0.972 | Six4          |  | -0.897 | Tril          |
| 0.97  | Itgb8         |  | -0.895 | Mgp           |
| 0.967 | Chrna5        |  | -0.892 | Clec4a3       |
| 0.967 | Cetn4         |  | -0.888 | Ppfia3        |
| 0.959 | Thbd          |  | -0.888 | Galnt14       |
| 0.958 | Scd4          |  | -0.885 | Gm11223       |
| 0.957 | Ift81         |  | -0.883 | C1qtnf5       |
| 0.955 | Plac8         |  | -0.88  | Col28a1       |
| 0.954 | Ccl8          |  | -0.877 | Mfrp          |
| 0.954 | LOC100503254  |  | -0.874 | Tmem200b      |
| 0.952 | Dennd2d       |  | -0.871 | Espl1         |
| 0.945 | Slc5a6        |  | -0.868 | Ube2c         |
| 0.944 | Kcna2         |  | -0.868 | Calr4         |
| 0.942 | 5930403L14Rik |  | -0.862 | Cldn5         |
| 0.94  | A930009E05Rik |  | -0.861 | Cks2          |
| 0.934 | Gm10673       |  | -0.86  | 4930506M07Rik |
| 0.929 | Peli3         |  | -0.858 | Bmx           |
| 0.927 | 1520402A15Rik |  | -0.857 | Kcna5         |
| 0.925 | Esr1          |  | -0.847 | Sdc3          |
| 0.919 | Gm13111       |  | -0.847 | Fam129b       |
| 0.912 | 9530015106Rik |  | -0.845 | Pbx3          |
| 0.911 | Lrrc4         |  | -0.844 | Pla2g7        |
| 0.91  | 6330439K17Rik |  | -0.839 | Capg          |
| 0.909 | Ankrd5        |  | -0.827 | Cdca3         |
| 0.901 | 9330132A10Rik |  | -0.825 | Lamb3         |
| 0.901 | Usp2          |  | -0.824 | C1qtnf6       |
| 0.895 | Dbp           |  | -0.824 | Fblim1        |
| 0.894 | Slc1a5        |  | -0.823 | Ucp2          |
| 0.888 | Vmn2r29       |  | -0.823 | Olfir558      |
| 0.882 | Nap1l3        |  | -0.823 | Myof          |
| 0.877 | Col20a1       |  | -0.823 | Fbn1          |
| 0.877 | Parm1         |  | -0.815 | S100b         |
| 0.869 | Abcg4         |  | -0.815 | Eln           |
| 0.868 | Aacs          |  | -0.813 | Kcnj15        |
| 0.855 | Cp            |  | -0.813 | Unc119        |
| 0.855 | LOC100503148  |  | -0.813 | Glyctk        |



|       |               |  |        |               |
|-------|---------------|--|--------|---------------|
| 0.851 | Bivm          |  | -0.813 | Ccdc144b      |
| 0.845 | Sfxn1         |  | -0.812 | Cacna1d       |
| 0.84  | Cdh19         |  | -0.808 | 2600006K01Rik |
| 0.84  | 2900064B18Rik |  | -0.807 | Plekhg1       |
| 0.836 | Prx           |  | -0.805 | Kcnc2         |
| 0.835 | Steap4        |  | -0.804 | Pla2g2e       |
| 0.833 | Bhlhe41       |  | -0.803 | Alox5ap       |
| 0.825 | Vat1l         |  | -0.801 | Plekhh2       |
| 0.821 | Gpr64         |  | -0.799 | Anpep         |
| 0.819 | Pard6g        |  | -0.798 | 4930414N08Rik |
| 0.814 | Tef           |  | -0.797 | Fam124a       |
| 0.814 | Ppargc1b      |  | -0.795 | Sorbs2        |
| 0.806 | Zfp961        |  | -0.793 | Mbd1          |
| 0.805 | Hlf           |  | -0.785 | Arhgap11a     |
| 0.797 | Phka2         |  | -0.784 | LOC100504290  |
| 0.796 | Prodh         |  | -0.783 | Tnfrsf23      |
| 0.794 | A830018L16Rik |  | -0.783 | Copg2as2      |
| 0.79  | Met           |  | -0.782 | Emilin1       |
| 0.79  | Bhlhb9        |  | -0.78  | 6330405D24Rik |
| 0.789 | LOC100504738  |  | -0.777 | Thsd1         |
| 0.788 | Gpd2          |  | -0.776 | Angpt2        |
| 0.78  | St3gal4       |  | -0.775 | Mark1         |
| 0.776 | Pla2g5        |  | -0.772 | Pde3a         |
| 0.776 | Mettl7a1      |  | -0.771 | Nusap1        |
| 0.773 | S100a1        |  | -0.77  | Specc1        |
| 0.772 | LOC100504139  |  | -0.768 | Vash1         |
| 0.772 | LOC100036513  |  | -0.768 | D030055H07Rik |
| 0.771 | Cenpv         |  | -0.763 | Fcgr3         |
| 0.767 | Podn          |  | -0.761 | Ndufa4l2      |
| 0.767 | Pdp2          |  | -0.758 | Fam20c        |
| 0.765 | Gstm7         |  | -0.756 | Slc16a12      |
| 0.765 | Chrdl1        |  | -0.756 | Poln          |
| 0.761 | Mlxipl        |  | -0.756 | Prssl1        |
| 0.753 | 9330161A08Rik |  | -0.75  | Tns3          |
| 0.752 | ND5           |  | -0.747 | Ptprk         |
| 0.752 | Acss3         |  | -0.747 | Pvr13         |
| 0.744 | Lgals12       |  | -0.745 | Sema6b        |
| 0.741 | Tcf7l2        |  | -0.744 | Hfe           |
| 0.739 | Hsd11b1       |  | -0.744 | LOC100504890  |
| 0.736 | LOC100505258  |  | -0.744 | LOC100504490  |
| 0.733 | Rgs7          |  | -0.744 | Col5a2        |
| 0.731 | Prr5l         |  | -0.74  | Pld3          |
| 0.729 | Mtus1         |  | -0.74  | LOC100045292  |

|       |               |  |        |               |
|-------|---------------|--|--------|---------------|
| 0.726 | Zfp467        |  | -0.739 | Mamdc2        |
| 0.725 | Sema3b        |  | -0.738 | Fgf13         |
| 0.715 | Il15ra        |  | -0.737 | Pam           |
| 0.713 | Nrn1          |  | -0.735 | Tubb2a        |
| 0.709 | Ucp3          |  | -0.732 | Hydin         |
| 0.705 | Fign          |  | -0.731 | Oip5          |
| 0.704 | 1700008J07Rik |  | -0.731 | Kcne1l        |
| 0.702 | Popdc2        |  | -0.73  | Tmem44        |
| 0.702 | E330009J07Rik |  | -0.728 | Sema7a        |
| 0.701 | Gm3289        |  | -0.727 | Slc9a5        |
| 0.698 | Clcn2         |  | -0.726 | Loxl2         |
| 0.698 | Pde3b         |  | -0.722 | Slc13a4       |
| 0.697 | A530020G20Rik |  | -0.722 | Rtn2          |
| 0.697 | C3            |  | -0.714 | Spry1         |
| 0.697 | Gbe1          |  | -0.712 | Fam110c       |
| 0.696 | 2010011I20Rik |  | -0.711 | D14Ertd449e   |
| 0.696 | Gstm6         |  | -0.71  | Gm10395       |
| 0.681 | Irs2          |  | -0.71  | Gm9746        |
| 0.68  | Oscp1         |  | -0.702 | Ltbp4         |
| 0.675 | Pnlcd1        |  | -0.701 | P2ry1         |
| 0.67  | Aspa          |  | -0.698 | Rian          |
| 0.669 | Ppm1k         |  | -0.695 | Pdlim7        |
| 0.668 | Klhl2         |  | -0.693 | Gm3601        |
| 0.668 | LOC100502725  |  | -0.692 | Vldlr         |
| 0.667 | Nnat          |  | -0.692 | E130203B14Rik |
| 0.664 | 1700029J07Rik |  | -0.691 | Tagln2        |
| 0.662 | Pfkfb2        |  | -0.69  | Myl4          |
| 0.659 | Thrb          |  | -0.69  | Mical2        |
| 0.657 | Bckdhb        |  | -0.688 | Bgn           |
| 0.654 | Hyal1         |  | -0.686 | Col4a2        |
| 0.653 | Sec24b        |  | -0.681 | Ppic          |
| 0.652 | Pygo1         |  | -0.681 | Fkbp10        |
| 0.651 | Per3          |  | -0.681 | Tmem37        |
| 0.649 | Dhtkd1        |  | -0.68  | Tanc1         |
| 0.649 | D3Ertd254e    |  | -0.677 | Ldb2          |
| 0.647 | Adhfe1        |  | -0.676 | 9030425E11Rik |
| 0.644 | St3gal6       |  | -0.676 | Copg2         |
| 0.642 | 2810055G20Rik |  | -0.673 | Tmem132a      |
| 0.641 | N4bp2l1       |  | -0.672 | Fbln2         |
| 0.64  | A130038J17Rik |  | -0.67  | Pde2a         |
| 0.634 | Maob          |  | -0.67  | Fabp5         |
| 0.634 | Pde1a         |  | -0.67  | Col3a1        |
| 0.633 | Nr1d1         |  | -0.67  | Kif20a        |

|       |               |  |        |          |
|-------|---------------|--|--------|----------|
| 0.633 | Aldh5a1       |  | -0.669 | Hspg2    |
| 0.632 | Ppp1r9a       |  | -0.667 | Dbn1     |
| 0.626 | Vegfa         |  | -0.667 | Hsd17b7  |
| 0.625 | ApoE          |  | -0.665 | Esam     |
| 0.625 | Dkc1          |  | -0.665 | Csf2ra   |
| 0.622 | Pfkfb1        |  | -0.665 | Afap1l2  |
| 0.617 | Trpv1         |  | -0.664 | Lbp      |
| 0.614 | Srebf1        |  | -0.663 | S100a6   |
| 0.613 | Zfp809        |  | -0.662 | Mcf2l    |
| 0.609 | Akap1         |  | -0.661 | Smtn     |
| 0.607 | Gpr146        |  | -0.659 | Tpd52    |
| 0.607 | Pxmp2         |  | -0.658 | Tm6sf1   |
| 0.605 | Nudt6         |  | -0.658 | Mpzl1    |
| 0.604 | Sqrdl         |  | -0.657 | S1pr1    |
| 0.604 | Dnajc28       |  | -0.656 | Ctsl     |
| 0.601 | Dbt           |  | -0.656 | Tie1     |
| 0.596 | Aldh6a1       |  | -0.655 | Fam122b  |
| 0.595 | Cept1         |  | -0.654 | Sh3pxd2b |
| 0.592 | Nfia          |  | -0.652 | Ablim3   |
| 0.586 | Blcap         |  | -0.652 | Ccdc88a  |
| 0.585 | LOC100048759  |  | -0.651 | C1qtnf9  |
| 0.584 | B230208H17Rik |  | -0.65  | Prnp     |
| 0.581 | Lman2l        |  | -0.649 | Col6a2   |

**Table S2.** Differentially regulated (up- and down-regulated) genes in BAT of adipo-P2Y6<sup>Δ/Δ</sup> mice.

| Log 2 (Fold change) | Gene symbol                  |
|---------------------|-------------------|---------------------|-------------------|---------------------|-------------------|---------------------|------------------------------|
| 8.853               | Myh7              | -5.552              | Itgad             | -1.185              | Bcl6b             | -0.804              | Fcgr2b                       |
| 6.613               | Gm8210            | -3.846              | 2610307P<br>16Rik | -1.184              | Ret               | -0.801              | Phactr2                      |
| 6.126               | Myl2              | -3.758              | Saa3              | -1.178              | Trim59            | -0.787              | Stmn1                        |
| 5.916               | Myh6              | -3.668              | Tph2              | -1.143              | Foxm1             | -0.761              | Cybb                         |
| 5.665               | Kng1              | -3.135              | Rtkn2             | -1.139              | Sgms2             | -0.761              | Tpm4                         |
| 4.36                | Tnnt1             | -3.126              | Mrgprg            | -1.129              | Vash1             | -0.759              | 4632428N<br>05Rik            |
| 2.786               | Tbx15             | -3.047              | Nr5a2             | -1.116              | Dnahc11           | -0.755              | Klf6                         |
| 2.45                | Ddit4l            | -2.94               | Slc5a7            | -1.106              | Dbf4              | -0.749              | Emilin1                      |
| 1.982               | Smyd1             | -2.899              | Mmp12             | -1.106              | Gpr65             | -0.748              | Epha4                        |
| 1.937               | A030001D<br>16Rik | -2.814              | Gdf15             | -1.091              | Zfyve28           | -0.739              | Gm11223                      |
| 1.923               | Unc13d            | -2.733              | Oxtr              | -1.086              | Cachd1            | -0.738              | Prkcdp                       |
| 1.762               | Cfd               | -2.691              | Unc79             | -1.066              | Cxcr4             | -0.736              | Cotl1                        |
| 1.751               | Spnb1             | -2.538              | Pbk               | -1.064              | Synpo2            | -0.735              | Rgl1                         |
| 1.73                | Phkg1             | -2.435              | Atp8b4            | -1.053              | Arhgap28          | -0.73               | Vcam1                        |
| 1.545               | 1500002F1<br>9Rik | -2.379              | Tubb2b            | -1.041              | Col28a1           | -0.727              | Tmem71                       |
| 1.445               | Fhl3              | -2.18               | F10               | -1.04               | Emb               | -0.725              | Robo4                        |
| 1.329               | Vat1l             | -2.166              | Ubd               | -1.038              | Adm               | -0.706              | Mcc                          |
| 1.296               | Nt5e              | -2.155              | Iftld1            | -1.037              | Pion              | -0.705              | 2900026A<br>02Rik            |
| 1.252               | LOC10050<br>4738  | -2.15               | Uchl1             | -1.012              | Slc6a13           | -0.705              | Cdc42ep3                     |
| 1.204               | Car3              | -2.131              | Mis18bp1          | -1.01               | Itga9             | -0.704              | Plscr4                       |
| 1.203               | Esr1              | -2.082              | Iqgap3            | -1.008              | Fmod              | -0.694              | Dapk1                        |
| 1.116               | Mmd2              | -2.06               | Itgax             | -1.007              | Prrx1             | -0.689              | Sirpa                        |
| 1.085               | Zmym3             | -2.004              | Shcbp1            | -0.999              | Pla2g2e           | -0.686              | Zfp366                       |
| 0.984               | Zfp949            | -1.997              | Kenj14            | -0.999              | 2310028H<br>24Rik | -0.684              | Cd93                         |
| 0.974               | 6330408M<br>09Rik | -1.958              | Fgf13             | -0.995              | Mtap1b            | -0.684              | Adam19                       |
| 0.956               | Pde4dip           | -1.93               | Dlgap5            | -0.99               | Npr3              | -0.682              | Fam111a                      |
| 0.927               | Osbp2             | -1.863              | Atp6v0d2          | -0.979              | Ctss              | -0.674              | Klhl13                       |
| 0.905               | Rasd1             | -1.853              | Prnd              | -0.977              | Pla2g2d           | -0.67               | Kalrn                        |
| 0.873               | Gpre5c            | -1.722              | 6820408C<br>15Rik | -0.968              | Cd44              | -0.669              | Tgfb1i1                      |
| 0.844               | Slc1a3            | -1.673              | 1700047G<br>03Rik | -0.96               | Copg2as2          | -0.667              | Fam49a                       |
| 0.837               | Gpx3              | -1.649              | Ncf4              | -0.949              | Me1               | -0.665              | St8sia4<br>9430037G<br>07Rik |
| 0.824               | Itpka             | -1.637              | Pdelc             | -0.938              | Myo1d             | -0.662              |                              |
| 0.818               | LOC10004<br>8759  | -1.623              | E2f8              | -0.93               | Pik3c2b           | -0.645              | Stard9                       |
| 0.805               | C3                | -1.622              | Cenpf             | -0.927              | Tanc2             | -0.642              | Oas2                         |
| 0.803               | Col23a1           | -1.614              | Tnc               | -0.921              | Zmynd15           | -0.64               | 2610305D<br>13Rik            |
| 0.785               | Radil             | -1.54               | Gpmb              | -0.916              | Mpeg1             | -0.638              | Parp14                       |

|       |                   |  |        |                   |        |           |        |                   |
|-------|-------------------|--|--------|-------------------|--------|-----------|--------|-------------------|
| 0.772 | Gm6658            |  | -1.517 | Ctgf              | -0.909 | Cdh23     | -0.637 | Shroom4           |
| 0.743 | Luc7l2            |  | -1.507 | Cd200r1           | -0.903 | Arhgef26  | -0.618 | Smtn              |
| 0.739 | Ankrd9            |  | -1.495 | Dyrk4             | -0.897 | Pawr      | -0.618 | Anxa3             |
| 0.729 | Slc2a12           |  | -1.486 | Mest              | -0.895 | Tbx18     | -0.617 | Pea15a            |
| 0.712 | Ampd2             |  | -1.477 | Tpx2              | -0.88  | Tuba1a    | -0.617 | 9330159M<br>07Rik |
| 0.709 | Atp5k             |  | -1.47  | C81189            | -0.862 | Sncg      | -0.617 | Ifit2             |
| 0.706 | Srl               |  | -1.446 | C3ar1             | -0.86  | Arhgap25  | -0.616 | Tshz2             |
| 0.7   | Prkag2            |  | -1.444 | Lbp               | -0.854 | Colec12   | -0.61  | Kirrel            |
| 0.681 | Eif4a2            |  | -1.373 | Gm15428           | -0.853 | Fam92a    | -0.608 | 11-Sep            |
| 0.681 | Ankrd5            |  | -1.362 | Top2a             | -0.852 | Chrnbl    | -0.604 | Lrrfip1           |
| 0.671 | 5930403L1<br>4Rik |  | -1.342 | Fcgr4             | -0.85  | Plekhg1   | -0.593 | Phldb2            |
| 0.667 | Des               |  | -1.34  | Lgals3            | -0.843 | Ctsc      | -0.592 | Ifi203            |
| 0.652 | Tst               |  | -1.338 | Mki67             | -0.838 | Fscn1     | -0.592 | Nid2              |
| 0.643 | Aesm3             |  | -1.327 | 2810417H<br>13Rik | -0.829 | Ppp1r16b  | -0.592 | Prcp              |
| 0.631 | Rps28             |  | -1.29  | Brca1             | -0.825 | Chic1     | -0.592 | Ugp2              |
| 0.62  | Rfc4              |  | -1.285 | Msr1              | -0.82  | Arhgap11a | -0.588 | Gm10791           |
| 0.613 | Hyal1             |  | -1.278 | Prnp              | -0.819 | Slc1a1    | -0.587 | Serpib9           |
| 0.582 | LOC10050<br>2825  |  | -1.268 | Nup210            | -0.818 | Edn1      | -0.584 | Tanc1             |
|       |                   |  | -1.267 | Cd84              | -0.818 | Shroom2   | -0.584 | Cntln             |
|       |                   |  | -1.21  | Clec7a            | -0.805 | Tspan6    | -0.583 | Nid1              |
|       |                   |  |        |                   |        |           | -0.583 | Ednrb             |

**Table S3.** List of primers used for RT-PCR studies.

| Gene name          | Forward (5'-3')           | Reverse (5'-3')          |
|--------------------|---------------------------|--------------------------|
| <i>P2ry6</i>       | GACCTGATGTATGCCTGTTCCAC   | CAGGATGCTGCCATGTAGATTG   |
| <i>18S rRNA</i>    | CGGCTACCACATCCAAGGAA      | GCTGGAATTACCGCGGCT       |
| <i>Leptin</i>      | CAAGCAGTGCCTATCCAGA       | AAGCCCAGGAATGAAGTCCA     |
| <i>Adiponectin</i> | GCACTGGCAAGTTCTACTGCAA    | GTAGGTGAAGAGAACGGCCTTGT  |
| <i>F4/80</i>       | TCCTGCTGTGTCGTGCTGTTTC    | GCCGTCTGGTTGTCAGTCTTGTC  |
| <i>Cd68</i>        | TGTCTGATCTTGCTAGGACCG     | GAGAGTAACGGCCTTTTTGTGA   |
| <i>Mcp1</i>        | GCTCAGCCAGATGCAGTTAA      | TCTTGAGCTTGGTGACAAAAACT  |
| <i>Il6</i>         | TAGTCCTTCTACCCCAATTTCC    | TTGGTCCTTAGCCACTCCTTC    |
| <i>Tnfa</i>        | CCCTCACACTCAGATCATCTTCT   | GCTACGACGTGGGCTACAG      |
| <i>Ifng</i>        | CGGCACAGTCATTGAAAGCCTA    | GTTGCTGATGGCCTGATTGTC    |
| <i>Mip1a</i>       | TGAGAGTCTTGAGGCAGCGA      | TGTGGGTACTTGGCAGCAAACA   |
| <i>Mip1b</i>       | AACAACATGAAGCTCTGCGT      | AGAAACAGCAGGAAGTGGGA     |
| <i>IL1a</i>        | ACGTCAAGCAACGGGAAGAT      | AAGGTGCTGATCTGGGTTGG     |
| <i>IL1b</i>        | CTCCACCTCAATGGACAGAA      | GCCGTCTTTCATTACACAGG     |
| <i>Ucp1</i>        | ACTGCCACACCTCCAGTCATT     | CTTTGCCTCACTCAGG ATTGG   |
| <i>Cidea</i>       | TGCTCTTCTGTATCGCCCAGT     | GCCGTGTTAAGGAATCTG CTG   |
| <i>Pgc1a</i>       | AGCCGTGACCACTGACAAC GAG   | GCTGCATGGTTCTGAGTGCTAAG  |
| <i>Ppara</i>       | GCGTACGGCAATGGCTTTAT      | GAACGGCTTCCTCAGGTTCTT    |
| <i>Pparg</i>       | GTGCCAGTTTCGATCCGTAGA     | GGCCAGCATCGTGTAGATGA     |
| <i>Cyte</i>        | AAATCTCCACGGTCTGTTCCG     | GGGTATCCTCTCCCCAGGTG     |
| <i>Cpt1</i>        | TTGCCCTACAGCTCTGGCATTTC   | GCACCCAGATGATTGGGATACTGT |
| <i>Mcad</i>        | ATGACGGAGCAGCCAATGAT      | TCGTCACCCTTCTTCTCTGCTT   |
| <i>Ap2</i>         | CGCAGACGACAGGAAGGT        | TTCCATCCCCTTCTGTCAC      |
| <i>Epstil</i>      | ACCCTGATAGCACCAAACGA      | AGGTCTGCCAGTTCTTGCTC     |
| <i>Eval</i>        | CCACTTCTCTGAGTTTACAGC     | GCATTTTAACCGAACATCTGTCC  |
| <i>Tbx1</i>        | GGCAGGCAGACGAATGTTC       | TTGTCATCTACGGGCACAAAG    |
| <i>Glut4</i>       | GTGACTGGAACACTG GTCCTA    | CCAGCCAGTTGCATTGTAG      |
| <i>Srebp1</i>      | AGTGGCAAAGGAGGCACTAC      | CACCCTCTGGAAGACCACA      |
| <i>Fas</i>         | GGAGGTGGTGATAGCCGGTAT     | TGGGTAATCCATAGAGCCAG     |
| <i>Tmem26</i>      | ACCCTGTCATCC CACAGAG      | TGTTTGGTGGAGTCCT AAGGTC  |
| <i>Glut1</i>       | CAGTTCGGCTATAACACTGGTG    | GCCCCGACAGAGAAGATG       |
| <i>Nrf1</i>        | GGAGCACTTACTGGAGTCC       | CTGTCCGATATCCTGGTGGT     |
| <i>Tfam</i>        | GCAAAGGATGATTCGGCTCAGGGAA | CCGGATCGTTTCACACTTCGACGG |
| <i>MtCo1</i>       | ACTATACTACTAACAGACCG      | GGTTCTTTTTTTCCGGAGTA     |
| <i>MtCo2</i>       | AACCATAGGGCACCAATGATAC    | GGATGGCATCAGTTTTAAGTCC   |
| <i>Esrrg</i>       | GCAAGGCATTCTTCAAGAGG      | GGCTGGGCAGCTGTACTCTA     |
| <i>Ppard</i>       | GACCAGAACACACGCTTCTT      | CCGACATTCCATGTTGAGG      |

|                                  |                           |                          |
|----------------------------------|---------------------------|--------------------------|
| <i>Prdm16</i>                    | CAGCACGGTGAAGCCATTC       | GCGTGCATCCGCTT GTG       |
| <i>Lpl</i>                       | CCCTACAAAGTGTTCATTA       | CTCGCTCTCGGCCACTGT       |
| <i>Ndufs1</i>                    | AGGATATGTTTCGCACAACTGG    | TCATGGTAACAGAATCGAGGGA   |
| <i>Ndufv2</i>                    | GCAAGGAATTTGCATAAGACAGC   | TAGCCATCCATTCTGCCTTTG    |
| <i>Atp50</i>                     | TCTCGACAGGTTTCGGAGCTT     | AGAGTACAGGGCGGTTGCATA    |
| <i>Cox5b</i>                     | TTCAAGGTTACTTCGCGGAGT     | CGGGACTAGATTAGGGTCTTCC   |
| <i>Cd36</i>                      | AGATGACGTGGCAAAGAACAG     | CCTTGGCTAGATAACGAACCTCG  |
| <i>Fabp1</i>                     | ATGAACCTTCTCCGGCAAGTACC   | CTGACACCCCCTTGATGTCC     |
| <i>Foxo1</i>                     | TTCAATTCGCCACAATCTGTCC    | GGGTGATTTTCCGCTCTTGC     |
| <i>Myh2</i>                      | TCACATCCAACAAGAAGCCAGAGC  | CCCTGGCTGACAAATGGGTAATCA |
| <i>Myh4</i>                      | AGTCCCAGGTCAACAAGCTG      | TTTCTCCTGTACCTCTCAACA    |
| <i>Myh7</i>                      | ACCAGGCCCTTTGACCTCAAGAAA  | TCTTGTCGAACCTGGGTGGGTTCT |
| <i>Cox8b</i>                     | GAACCATGAAGCCAACGACT      | GCGAAGTTCACAGTGGTTCC     |
| <i>Dio2</i>                      | CATTGATGAGGCTCACCCCTC     | GGTCCGGTGCTTCTTAACCT     |
| <i>Fgf21</i>                     | CTGCTGGGGGTCTACCAAG       | CTGCGCCTACCACTGTTCC      |
| <i>G6pc</i>                      | CGACTCGCTATCTCCAAGTGA     | GTTGAACCAGTCTCCGACCA     |
| <i>Pdk4</i>                      | CCGCTTAGTGAACACTCCTTC     | TGACCAGCGTGTCTACAAACT    |
| <i>Pck1</i>                      | CTGCATAACGGTCTGGACTTC     | CAGCAACTGCCCGTACTCC      |
| <i>Serca1</i>                    | TGTTTGTCTATTTTCGGGGTG     | AATCCGCACAAGCAGGTCCTC    |
| <i>Serca2</i>                    | GAGAACGCTCACACAAAGACC     | CAATTCGTTGGAGCCCCAT      |
| <i>Universal-Cre</i>             | ACCTGAAGATGTTTCGCGATTATCT | ACCGTCAGTACGTGAGATATCTT  |
|                                  |                           |                          |
| <b>Mitochondrial DNA primers</b> |                           |                          |
| <i>CoxII</i>                     | GCCGACTAAATCAAGCAACA      | CAATGGGCATAAAGCTATGG     |
| <i>Globin</i>                    | GAAGCGATTCTAGGGAGCAG      | GGAGCAGCGATTCTGAGTAGA    |
|                                  |                           |                          |
| <b>Chip primers</b>              |                           |                          |
| <i>Ppara-promoter</i>            | TGGCATAGCACACATTCGT       | GCTTTGCTTGTGTCTGTCCTT    |
